# Supplementary material for: Quality of Information Regarding Repair Restorations on Dentist Websites: Systematic Search and Analysis
Source: PubMed Central journal article supplement (PMC7191344; doi:10.2196/17250), 2020-04-15
Supplement: jmir_v22i4e17250_app2.pdf [file jmir_v22i4e17250_app2.pdf]

Identification

2,864 webpages identified through search engines  
(google.de: 1,299; bing.de / yahoo.de: 1,295; ask.com: 270)

Screening

820 webpages screened in full-texts

746 webpages with irrelevant information excluded

74 webpages screened for eligibility

24 webpages excluded as redundant

Inclusion

50 eligible websites included for synthesis
